# Supplementary material for: In Vivo Hypoglycemic Effects, Potential Mechanisms and LC-MS/MS Analysis of Dendropanax Trifidus Sap Extract
Source: MDPI journal article supplement (doi:10.3390/nu13124332), 2021-11-30
Supplement: s1 [file s1]

## Supplementary Materials

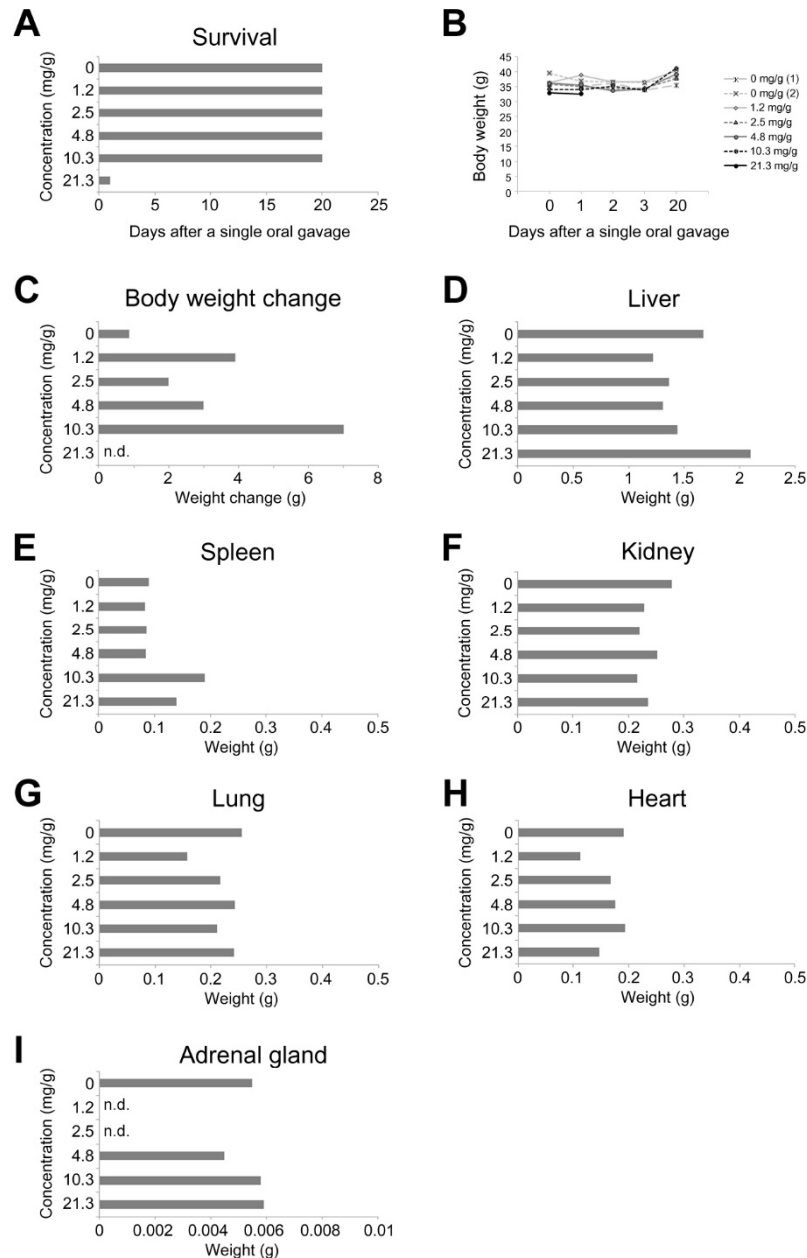

**Figure S1. Survival rates, body and organ weights by a single oral administration of *Dendropanax trifidus* (DT) sap.** (A) Survival days after a single oral administration. (B) Body weight after a single oral administration at the indicated days. (C-I) Changes of body and organ weights at day 20 (mg/g for DT sap weight/body weight): (C) body weight change; (D) liver weight; (E) spleen weight; (F) kidney weight; (G) lung weight; (H) heart weight; (I) adrenal gland weight. N=1. n.d., no data.

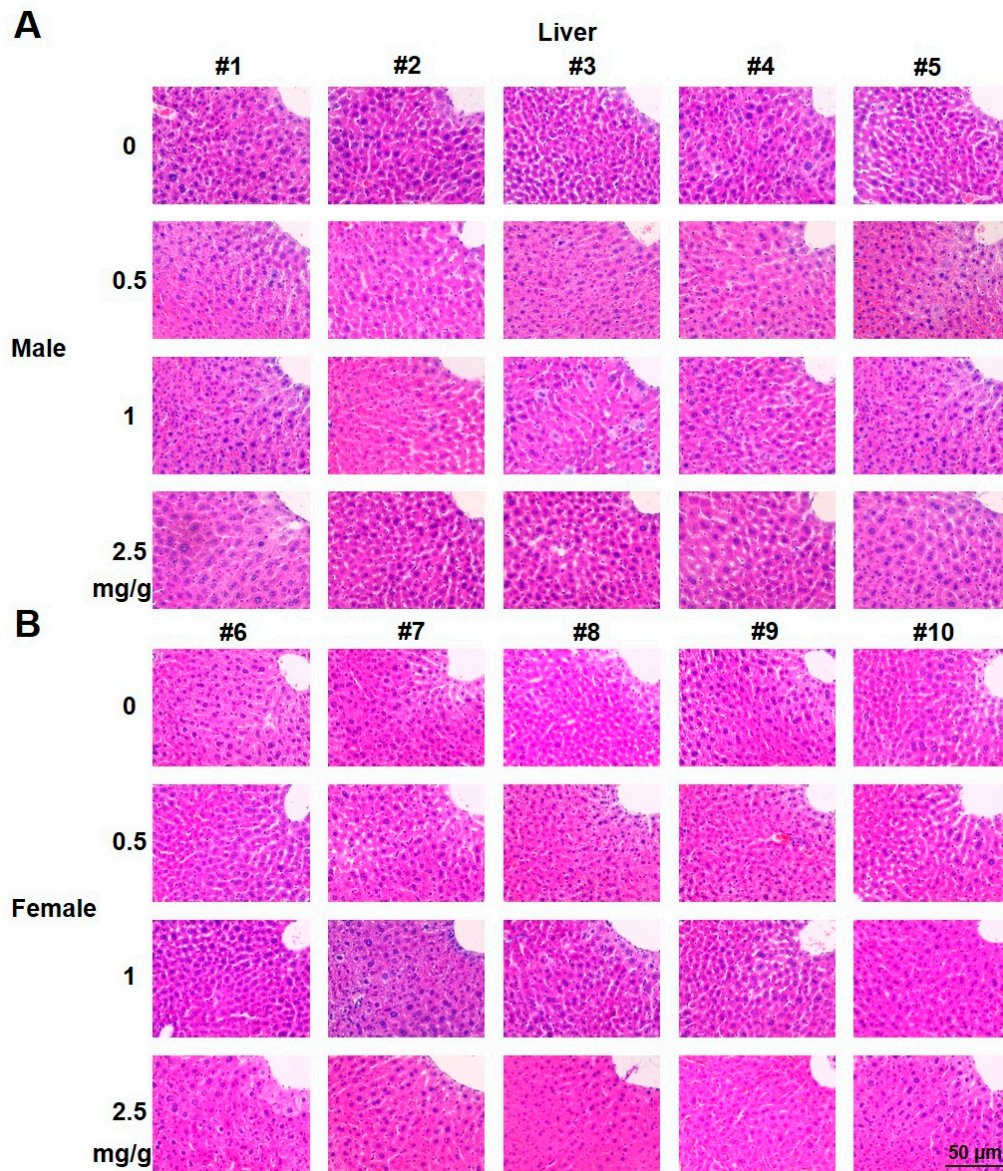

**Figure S2. Morphology of liver tissue by *Dendropanax trifidus* (DT) sap administrations to mice.** DT sap of the indicated concentrations (0, 0.5, 1, 2.5 mg/g for DT sap weight/body weight) were given to 9 weeks old-ICR mice (N = 5 per each concentration) by oral gavage every day for 14 days. H&E staining was performed for liver tissue. (A) male mice; (B) female mice. #1~#10 indicates each mouse number. Scale bar, 50  $\mu$ m.

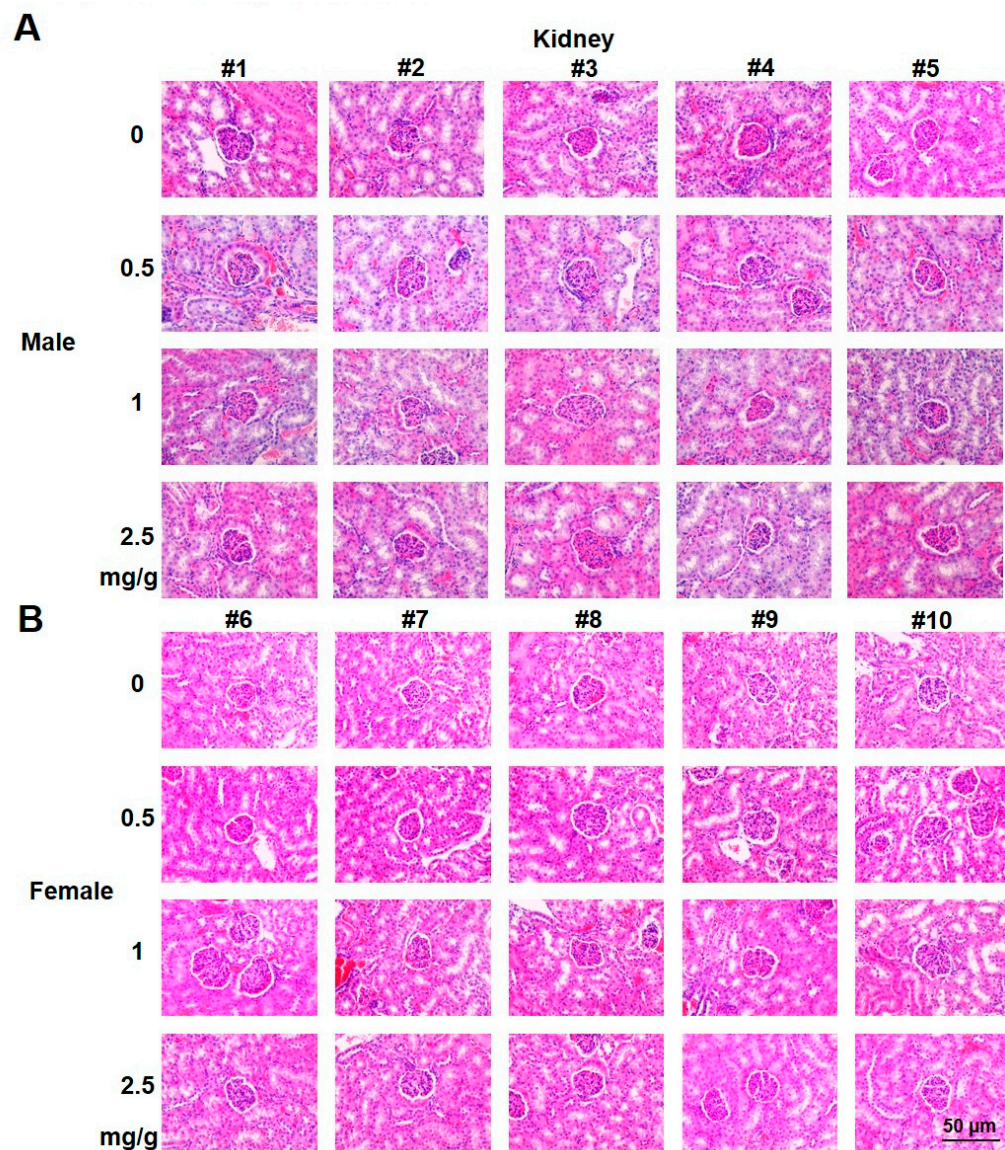

**Figure S3. Morphology of kidney tissue by *Dendropanax trifidus* (DT) sap administrations to mice.** DT sap of the indicated concentrations (0, 0.5, 1, 2.5 mg/g for DT sap weight/body weight) were given to 9 weeks old-ICR mice (N = 5 per each concentration) by oral gavage every day for 14 days. H&E staining was performed for kidney. (A) male mice; (B) female mice. #1~#10 indicates each mouse number. Scale bar, 50  $\mu$ m.



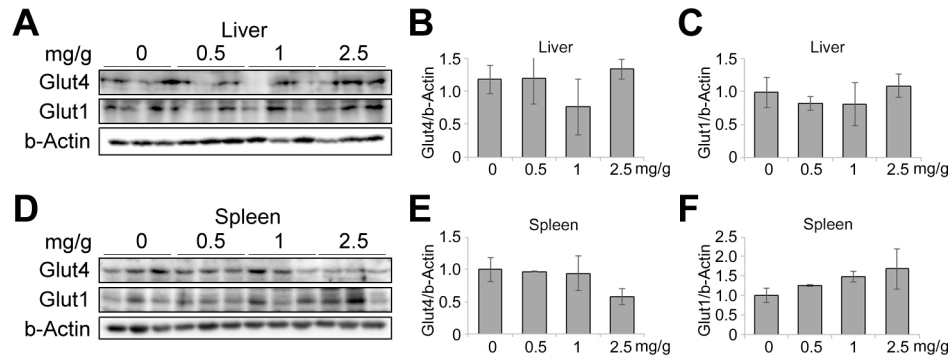

**Figure S4. Effects of *Dendropanax trifidus* (DT) sap administrations on the protein expression level of glucose transporters.** DT sap of the indicated concentrations (0, 0.5, 1, 2.5 mg/g for DT sap weight/body weight) were given to 9 weeks old-ICR mice by oral gavage every day for 14 days. Western blot analysis was performed on liver (A-C) and spleen (D-F) tissues against antibodies to Glut1, Glut4 and b-Actin, as indicated. (B, E) Relative value of Glut4 intensity normalized by b-Actin. (C, F) Relative value of Glut1 intensity normalized by  $\beta$ -Actin. N = 3 (female) mice per group. 20  $\mu$ g/lane. Bars indicate mean  $\pm$  s.e.m.

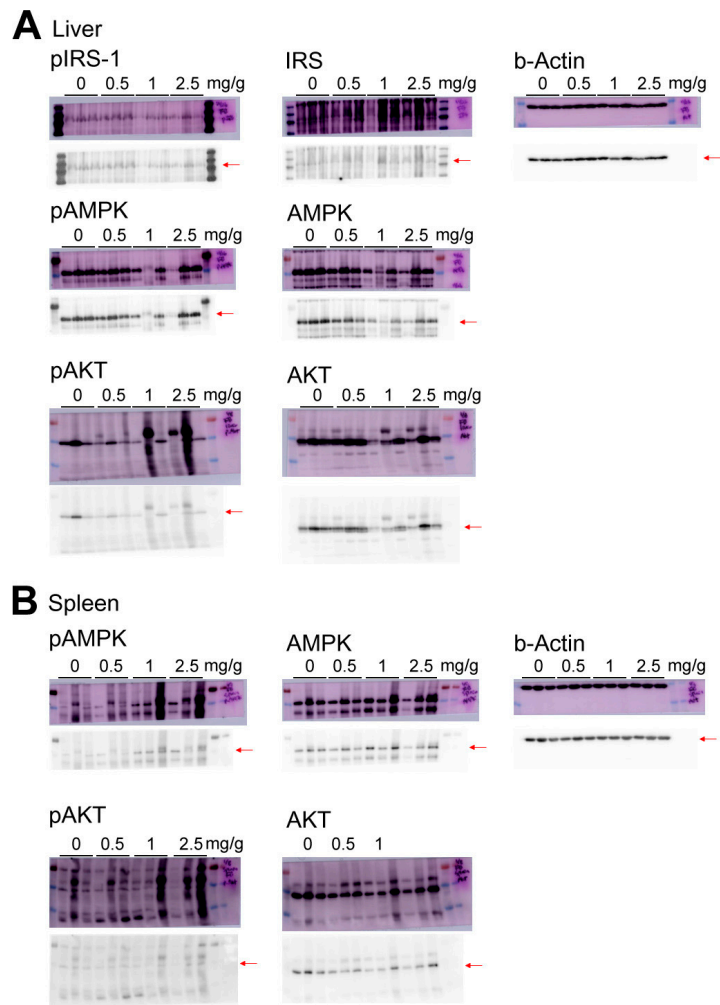

**Figure S5. Western blot Images of Figure 6.** (A) Western blot images of liver samples. (B) Western blot images of spleen samples. Red arrows indicate the targeted molecular weight.

**Table S1. Mouse number used in each experiment.**

| <b>Figure 2, 3.</b> |        |                 |
|---------------------|--------|-----------------|
| Conc.               | Sex    | Number of mouse |
| mg/g                |        |                 |
| 0                   | male   | 5               |
| 0.5                 |        | 5               |
| 1                   |        | 5               |
| 2.5                 |        | 5               |
| 0                   | female | 4               |
| 0.5                 |        | 4               |
| 1                   |        | 4               |
| 2.5                 |        | 4               |

| <b>Figure 4.</b> |        |                 |     |    |     |     |     |     |     |    |      |     |
|------------------|--------|-----------------|-----|----|-----|-----|-----|-----|-----|----|------|-----|
| Conc.            | Sex    | Number of mouse |     |    |     |     |     |     |     |    |      |     |
| mg/g             |        | GOT             | GPT | TP | BUN | ALP | LDH | HDL | LDL | TG | CHOL | GLU |
| 0                | male   | 5               | 5   | 5  | 5   | 5   | 5   | 4   | 4   | 4  | 4    | 4   |
| 0.5              |        | 5               | 5   | 5  | 5   | 5   | 5   | 3   | 3   | 3  | 3    | 3   |
| 1                |        | 5               | 5   | 5  | 5   | 5   | 5   | 5   | 5   | 4  | 5    | 5   |
| 2.5              |        | 4               | 4   | 4  | 4   | 4   | 4   | 4   | 4   | 3  | 4    | 4   |
| 0                | female | 4               | 4   | 4  | 4   | 4   | 4   | 4   | 4   | 4  | 4    | 4   |
| 0.5              |        | 4               | 4   | 4  | 4   | 4   | 4   | 4   | 4   | 4  | 4    | 4   |
| 1                |        | 4               | 4   | 4  | 4   | 4   | 4   | 4   | 4   | 4  | 4    | 4   |
| 2.5              |        | 3               | 3   | 3  | 3   | 3   | 3   | 3   | 3   | 3  | 3    | 3   |

| <b>Figure 5, Supplementary material 2, 3.</b> |        |                 |        |
|-----------------------------------------------|--------|-----------------|--------|
| Conc.                                         | Sex    | Number of mouse |        |
| mg/g                                          |        | Liver           | Kidney |
| 0                                             | male   | 5               | 5      |
| 0.5                                           |        | 5               | 5      |
| 1                                             |        | 5               | 5      |
| 2.5                                           |        | 5               | 5      |
| 0                                             | female | 5               | 5      |
| 0.5                                           |        | 5               | 5      |
| 1                                             |        | 5               | 5      |
| 2.5                                           |        | 5               | 5      |

| <b>Figure 6, Supplementary material 4.</b> |     |                 |
|--------------------------------------------|-----|-----------------|
| Conc.                                      | Sex | Number of mouse |

| mg/g |        | Liver | Spleen |
|------|--------|-------|--------|
| 0    | female | 3     | 3      |
| 0.5  |        | 3     | 3      |
| 1    |        | 3     | 3      |
| 2.5  |        | 3     | 3      |

| Supplementary material 1. |                 |
|---------------------------|-----------------|
| Conc.                     | Number of mouse |
| mg/g                      |                 |
| 0                         | 2               |
| 1.2                       | 1               |
| 2.5                       | 1               |
| 4.8                       | 1               |
| 10.3                      | 1               |
| 21.3                      | 1               |

**Table S2. Summary of the concentration-dependent effects in vivo.** "O" shows a non-significant change, while "X" indicates a significantly different value from that of the vehicle control at the indicated concentration.

| Sex                  |               | Female |     |   |     | Male |     |   |     |
|----------------------|---------------|--------|-----|---|-----|------|-----|---|-----|
| Concentration (mg/g) |               | 0      | 0.5 | 1 | 2.5 | 0    | 0.5 | 1 | 2.5 |
| Survival rate        |               | O      | O   | O | X   | O    | O   | O | X   |
| Body weight          |               | O      | O   | O | O   | O    | O   | O | O   |
| Organ weight         | Liver         | O      | O   | O | X   | O    | O   | O | X   |
|                      | Spleen        | O      | O   | O | O   | O    | O   | O | O   |
|                      | Kidney        | O      | O   | O | X   | O    | O   | X | X   |
|                      | Lung          | O      | O   | O | O   | O    | O   | O | O   |
|                      | Heart         | O      | O   | O | X   | O    | O   | O | X   |
|                      | Adrenal gland | O      | O   | O | O   | O    | O   | O | O   |
| Blood chemistry      | GLU           | O      | O   | O | O   | O    | O   | O | O   |
|                      | GPT           | O      | O   | O | O   | O    | O   | O | O   |
|                      | GOT           | O      | O   | O | O   | O    | O   | O | O   |
|                      | TP            | O      | O   | O | O   | O    | O   | O | O   |
|                      | BUN           | O      | O   | O | O   | O    | O   | O | O   |
|                      | ALP           | O      | O   | X | O   | O    | O   | O | O   |
|                      | LDH           | O      | O   | O | O   | O    | O   | O | O   |
|                      | TG            | O      | O   | O | O   | O    | O   | O | O   |
|                      | CHOL          | O      | O   | O | O   | O    | O   | O | O   |
|                      | LDL           | O      | O   | O | O   | O    | O   | O | O   |
|                      | HDL           | O      | O   | O | O   | O    | O   | O | O   |
| Histochemistry       | Liver         | O      | O   | O | O   | O    | O   | O | O   |
|                      | Kidney        | O      | O   | O | O   | O    | O   | O | O   |
